# Supplementary material for: The Rheolaser Master™ and Kinexus Rotational Rheometer® to Evaluate the Influence of Topical Drug Delivery Systems on Rheological Features of Topical Poloxamer Gel
Source: MDPI journal article supplement (doi:10.3390/molecules25081979), 2020-04-23
Supplement: s1 [file s1]

# The Rheolaser Master™ and Kinexus Rotational Rheometer® to Evaluate the Influence of Topical Drug Delivery Systems on Rheological Features of Topical Poloxamer Gel

Maria Chiara Cristiano <sup>1</sup>, Francesca Froiio <sup>1</sup>, Antonia Mancuso <sup>2</sup>, Federica De Gaetano <sup>3</sup>, Cinzia Anna Ventura <sup>3</sup>, Massimo Fresta <sup>2</sup> and Donatella Paolino <sup>1,\*</sup>

<sup>1</sup> Department of Experimental and Clinical Medicine, School of Pharmacy and Nutraceuticals, University "Magna Græcia" of Catanzaro, Campus Universitario "S. Venuta"-Building of BioSciences, Viale S. Venuta, I-88100 Germaneto-Catanzaro, Italy; mchiara.cristiano@unicz.it (M.C.C.); f.froiio@unicz.it (F.F.);

<sup>2</sup> Department of Health Sciences, School of Pharmacy and Nutraceuticals, University "Magna Græcia" of Catanzaro, Campus Universitario "S. Venuta"- Building of BioSciences, Viale S. Venuta, I-88100 Germaneto-Catanzaro, Italy; antonia.mancuso@unicz.it (A.M.); fresta@unicz.it (M.F.)

<sup>3</sup> Department of Chemical, Biological, Pharmaceutical and Environmental Sciences, University of Messina, Viale Ferdinando Stagno D'Alcontres 31, Messina I-98166, Italy; fedegaetano@unime.it (F.D.G.); caventura@unime.it (C.A.V.)

\* Correspondence: paolino@unicz.it; Tel.: +39+0961+369+4118; Fax: +39+0961+369+4237

Table S1 Gelation temperature of Poloxamer 407 solutions. Each value represents the mean  $\pm$  S.D. of three experiments.

| Poloxamer 407 concentration (% w/w) | Gelation Temperature ( $^{\circ}$ C) |
|-------------------------------------|--------------------------------------|
| 15                                  | $37 \pm 0.5$                         |
| 17                                  | $36 \pm 0.5$                         |
| 20                                  | $21 \pm 0.2$                         |
| 25                                  | $< 20$                               |
| 30                                  | $< 20$                               |

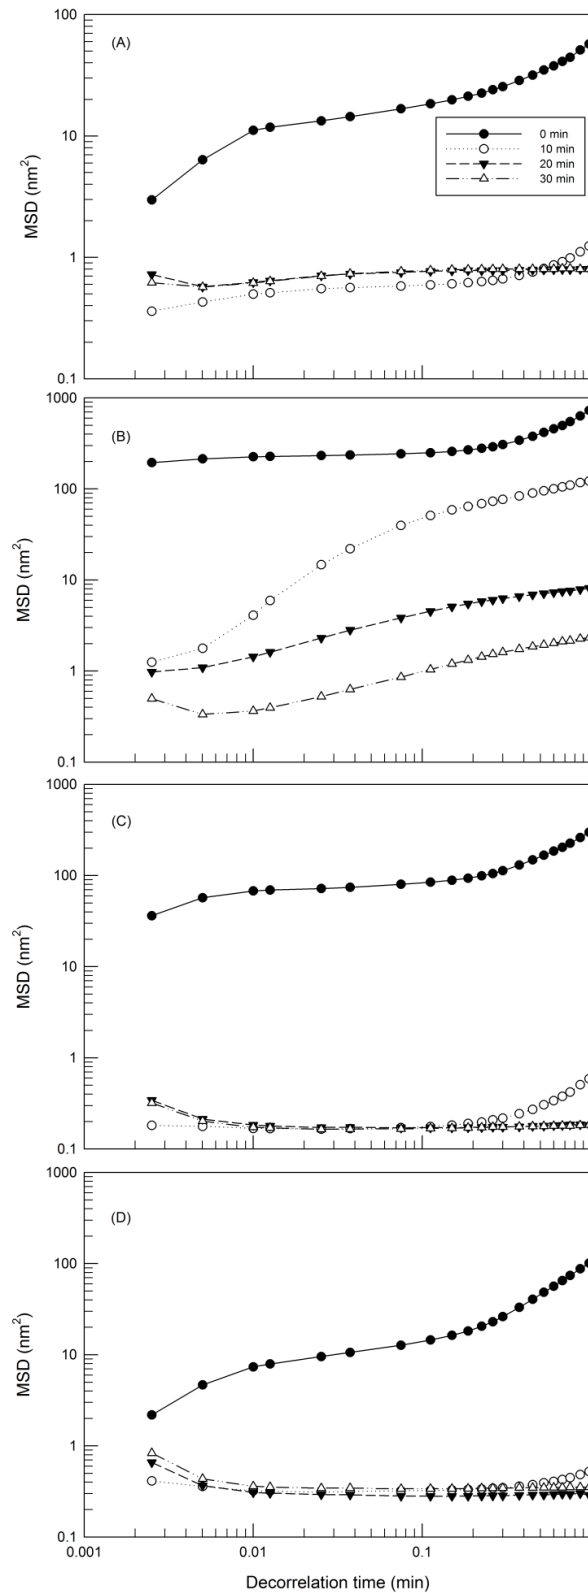

Figure S1: Mean square displacement MSD for 25% Poloxamer 407 gel without carriers (A), or with ethosomes (B), transfersomes (C) and niosomes (D) as a function of decorrelation time. The illustrated results are one of the parallel experiments.

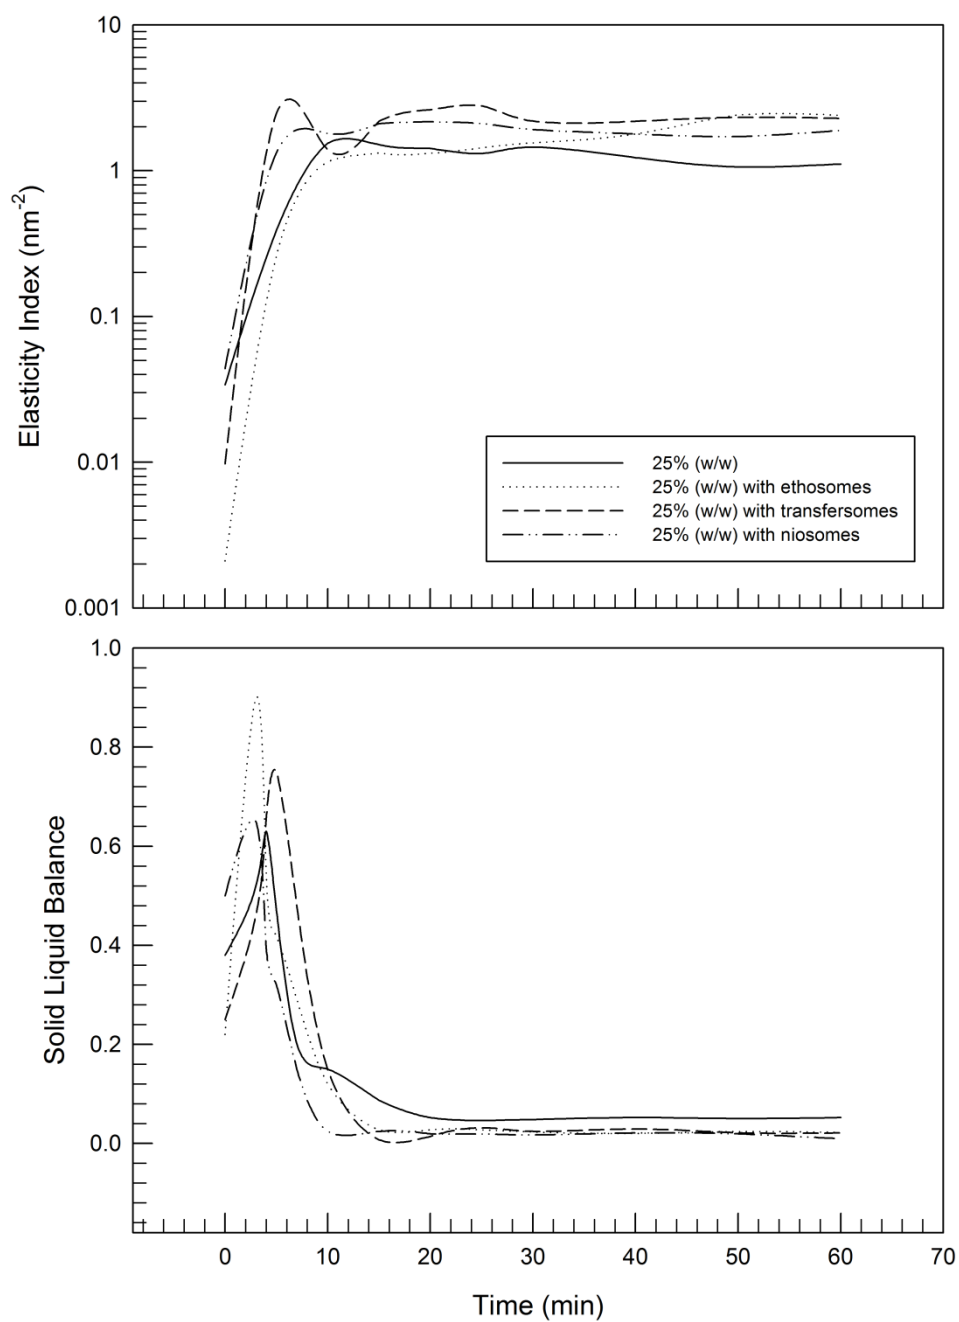

Figure S2: Elasticity Index (EI) and Solid Liquid Balance profile versus time for 25% (w/w) Poloxamer 470 with and without TDDSs.

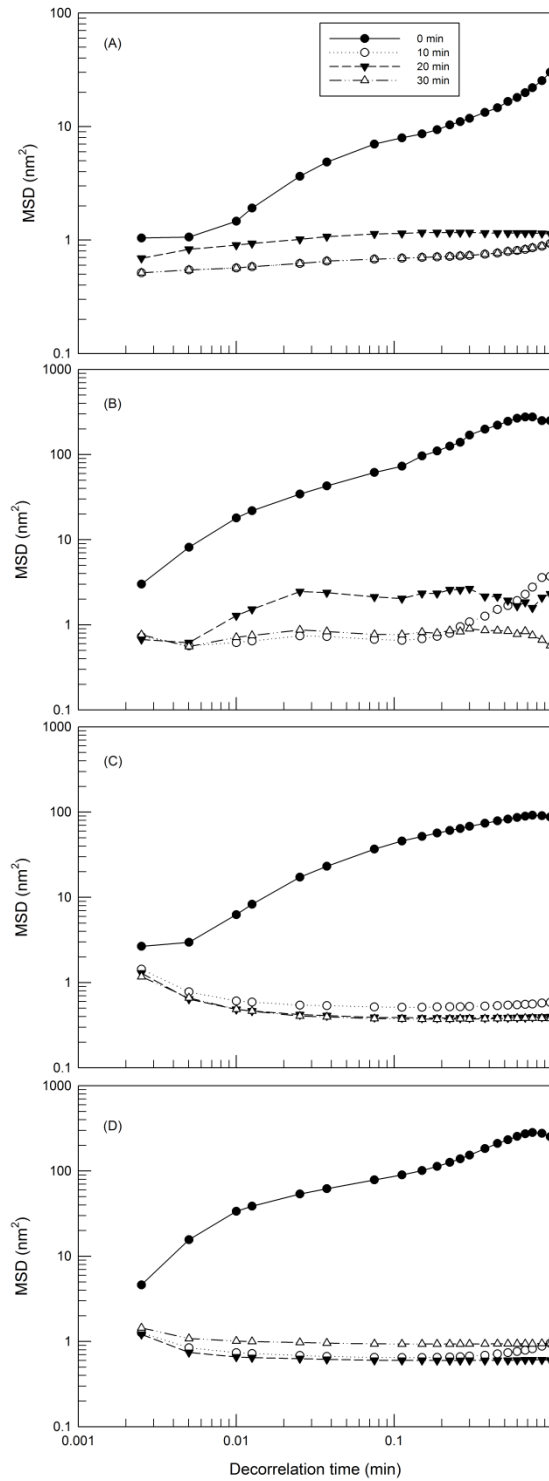

Figure S3: Mean square displacement MSD for 30% Poloxamer 407 gel without carriers (A), or with ethosomes (B), transfersomes (C) and niosomes (D) as a function of decorrelation time. The illustrated results are one of the parallel experiments.

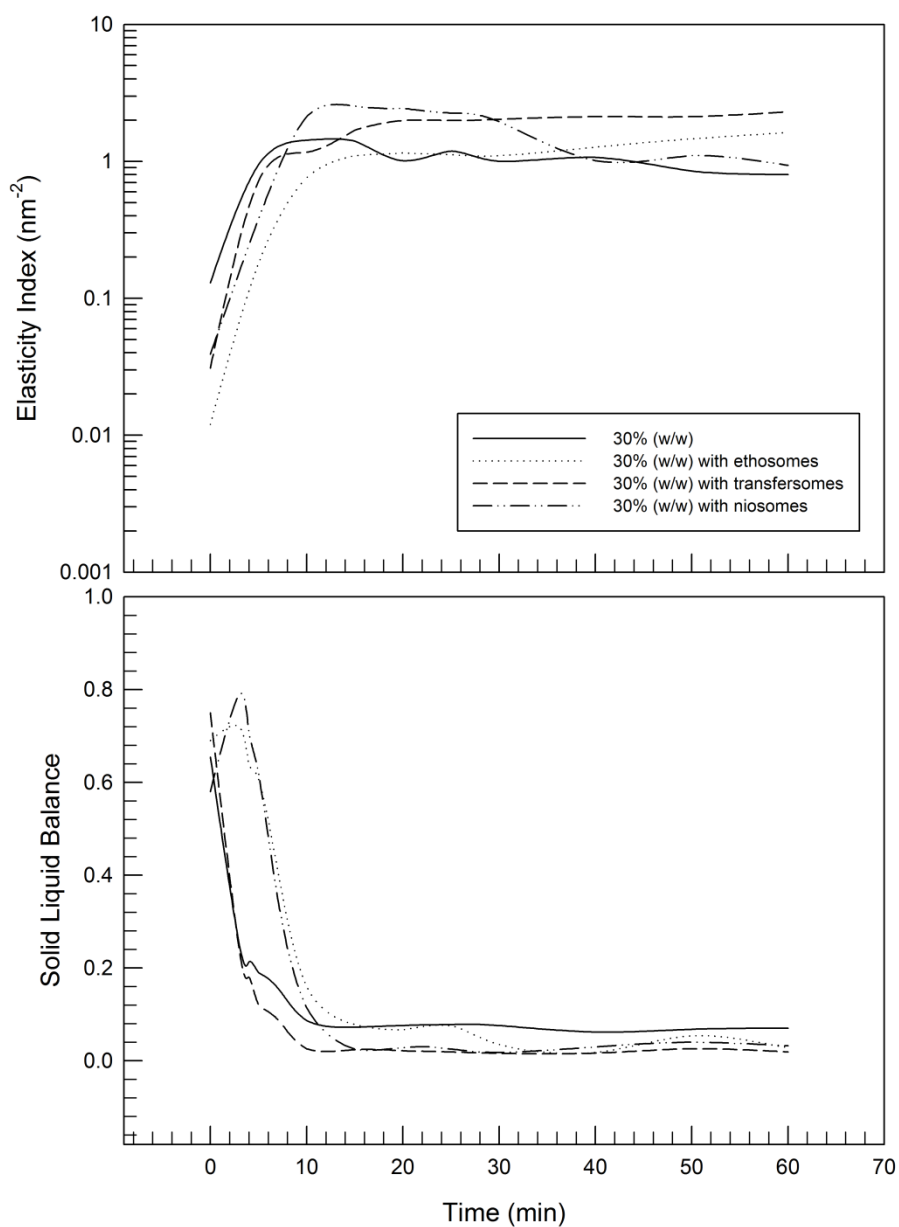

Figure S4: Elasticity Index (EI) and Solid Liquid Balance profile versus time for 30% (w/w) Poloxamer 470 with and without TDDSs.
